# Supplementary material for: Production of 5-hydroxymethylfurfural from fructose using a spherically fibrous KCC-1 silica catalyst
Source: Royal Society of Chemistry journal article supplement (doi:10.1039/c6ra03382b), 2016-01-01
Supplement: c6ra03382b1.pdf [file c6ra03382b1.pdf]

Data Path : D:\result\sample AR\920506\  
Data File : SONIYA FATAHI SAMPLE 19.D  
Acq On : 7 Oct 2013 12:49  
Operator :  
Sample :  
Misc :  
ALS Vial : 1 Sample Multiplier: 1

Search Libraries: C:\Database\wiley7n.1

Minimum Quality: 0

Unknown Spectrum: Apex

Integration Events: RTE Integrator - razavi.P

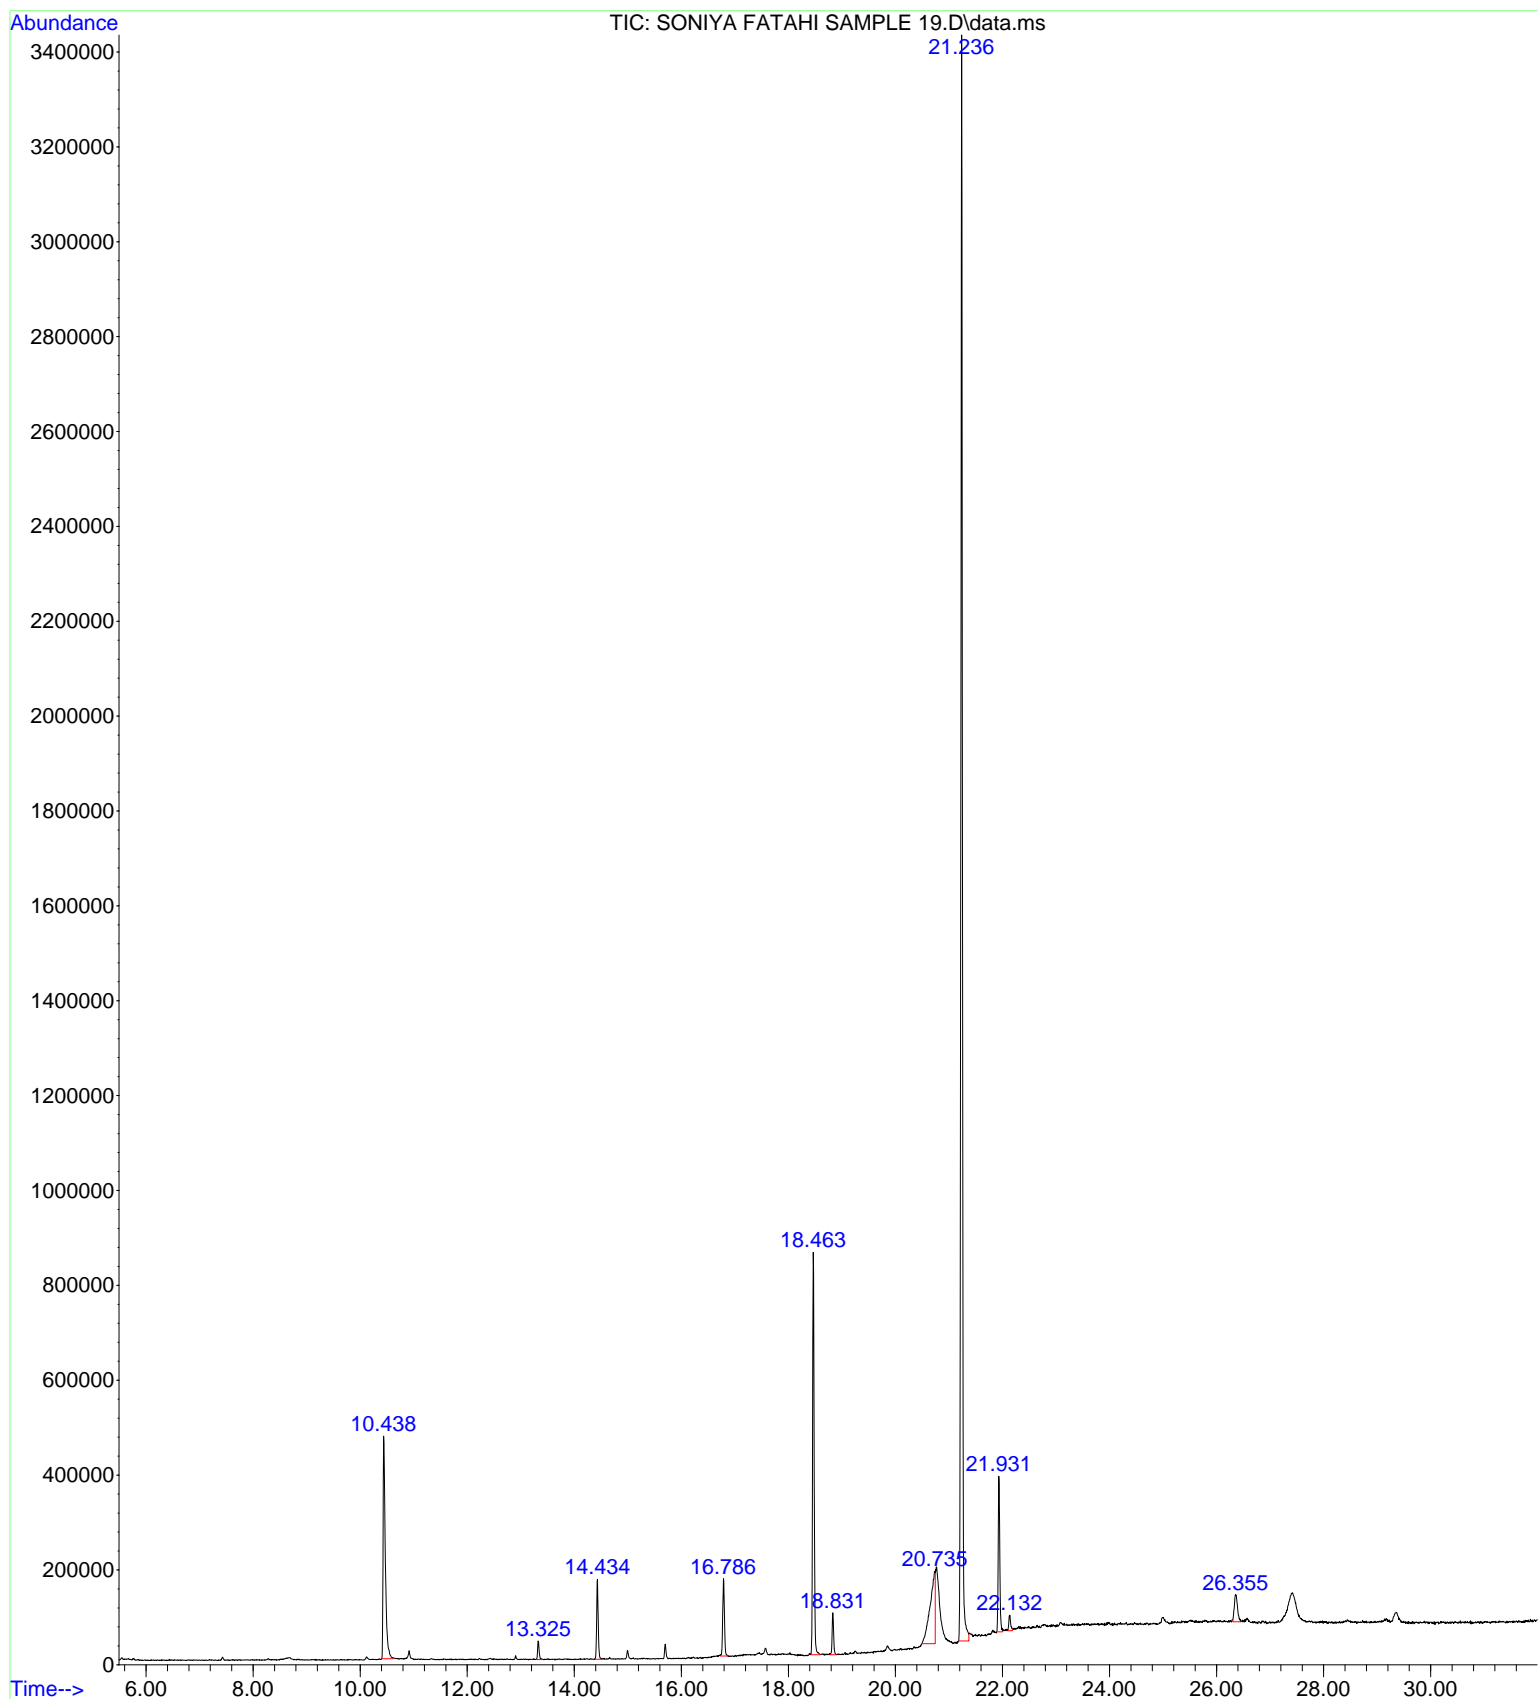

## Unknown Spectrum based on Apex

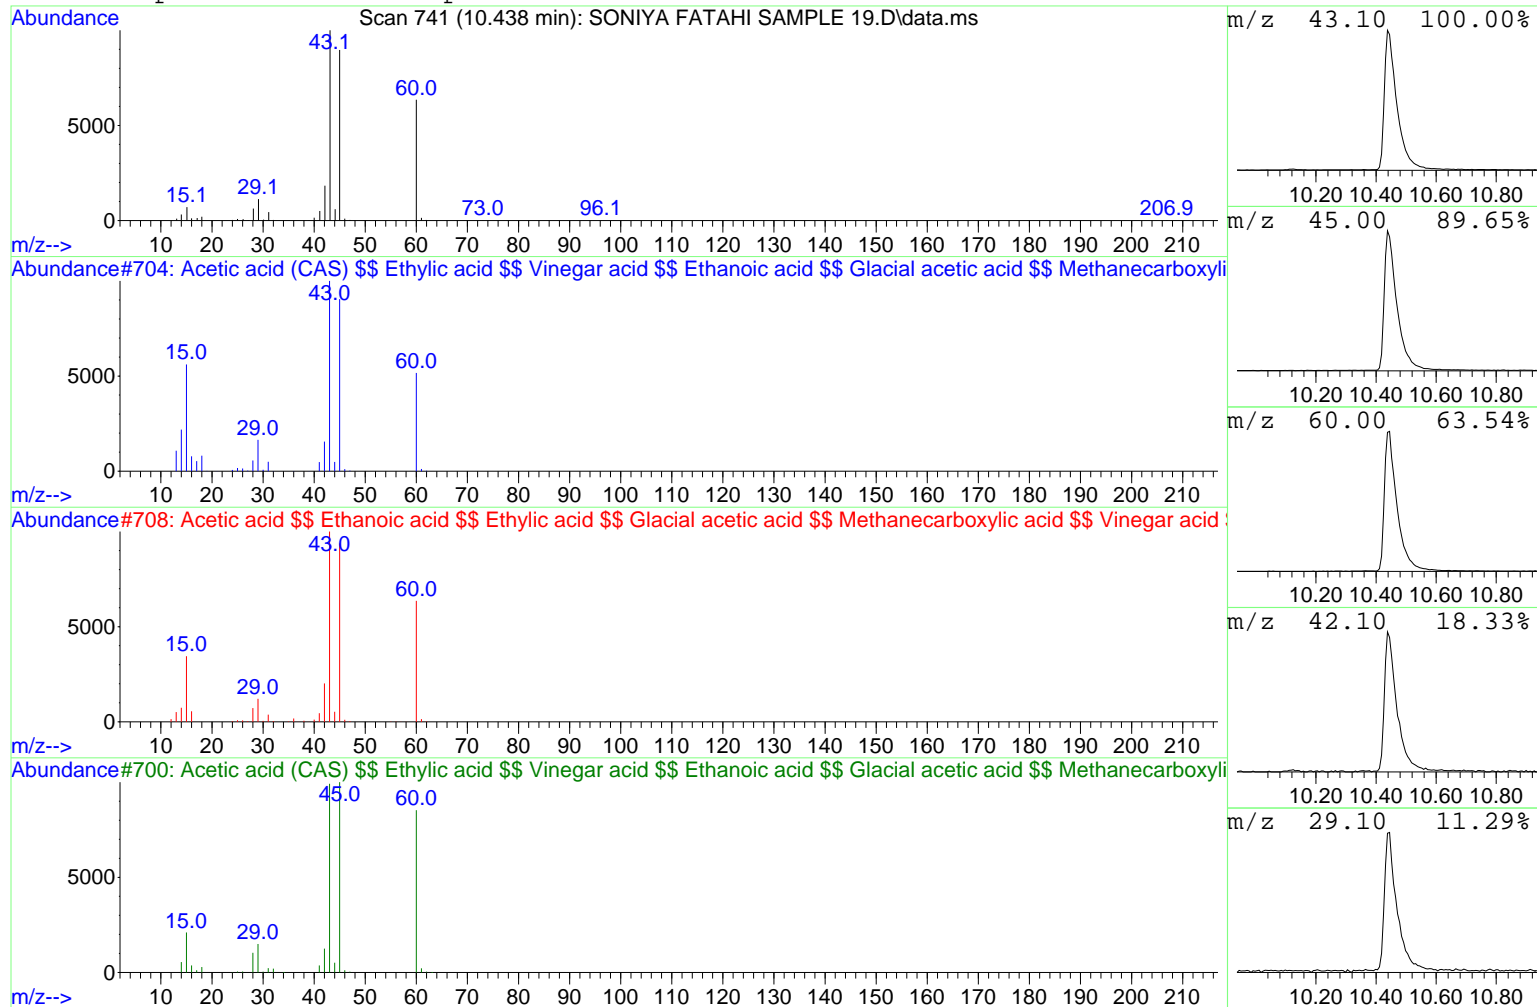

Data File: D:\result\sampl AR\920506\SONIYA FATAHI SAMPLE 19.D

Sample :

Peak Number: 1 at 10.438 min Area: 1360661 Area % 10.22

The 3 best hits from each library.

Ref\# CAS\# Qual

C:\Database\wiley7n.l

| Ref\# | CAS\#           | Qual |
|-------|-----------------|------|
| 1     | 704 000064-19-7 | 91   |
| 2     | 708 000064-19-7 | 91   |
| 3     | 700 000064-19-7 | 91   |

## Unknown Spectrum based on Apex

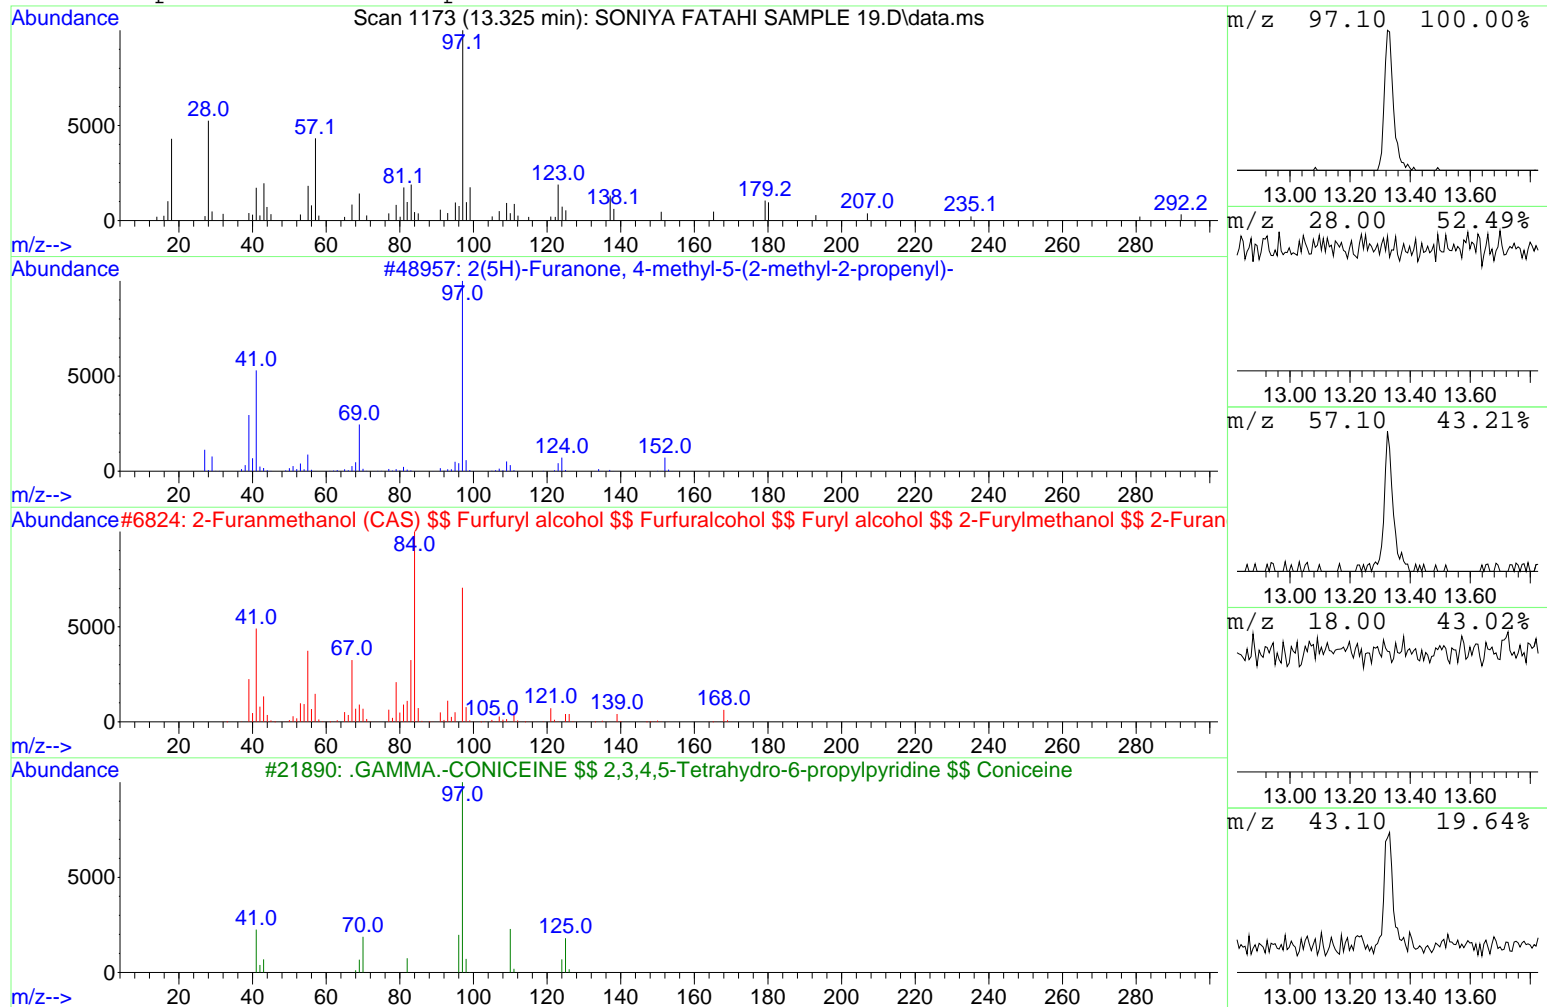

Data File: D:\result\sample AR\920506\SONIYA FATAHI SAMPLE 19.D

Sample :

Peak Number: 2 at 13.325 min Area: 77546 Area % 0.58

The 3 best hits from each library.

Ref\# CAS\# Qual

C:\Database\wiley7n.1

| Ref\# | CAS\#             | Qual |
|-------|-------------------|------|
| 1     | 48957 089902-24-9 | 53   |
| 2     | 6824 000098-00-0  | 47   |
| 3     | 21890 000000-00-0 | 43   |

## Unknown Spectrum based on Apex

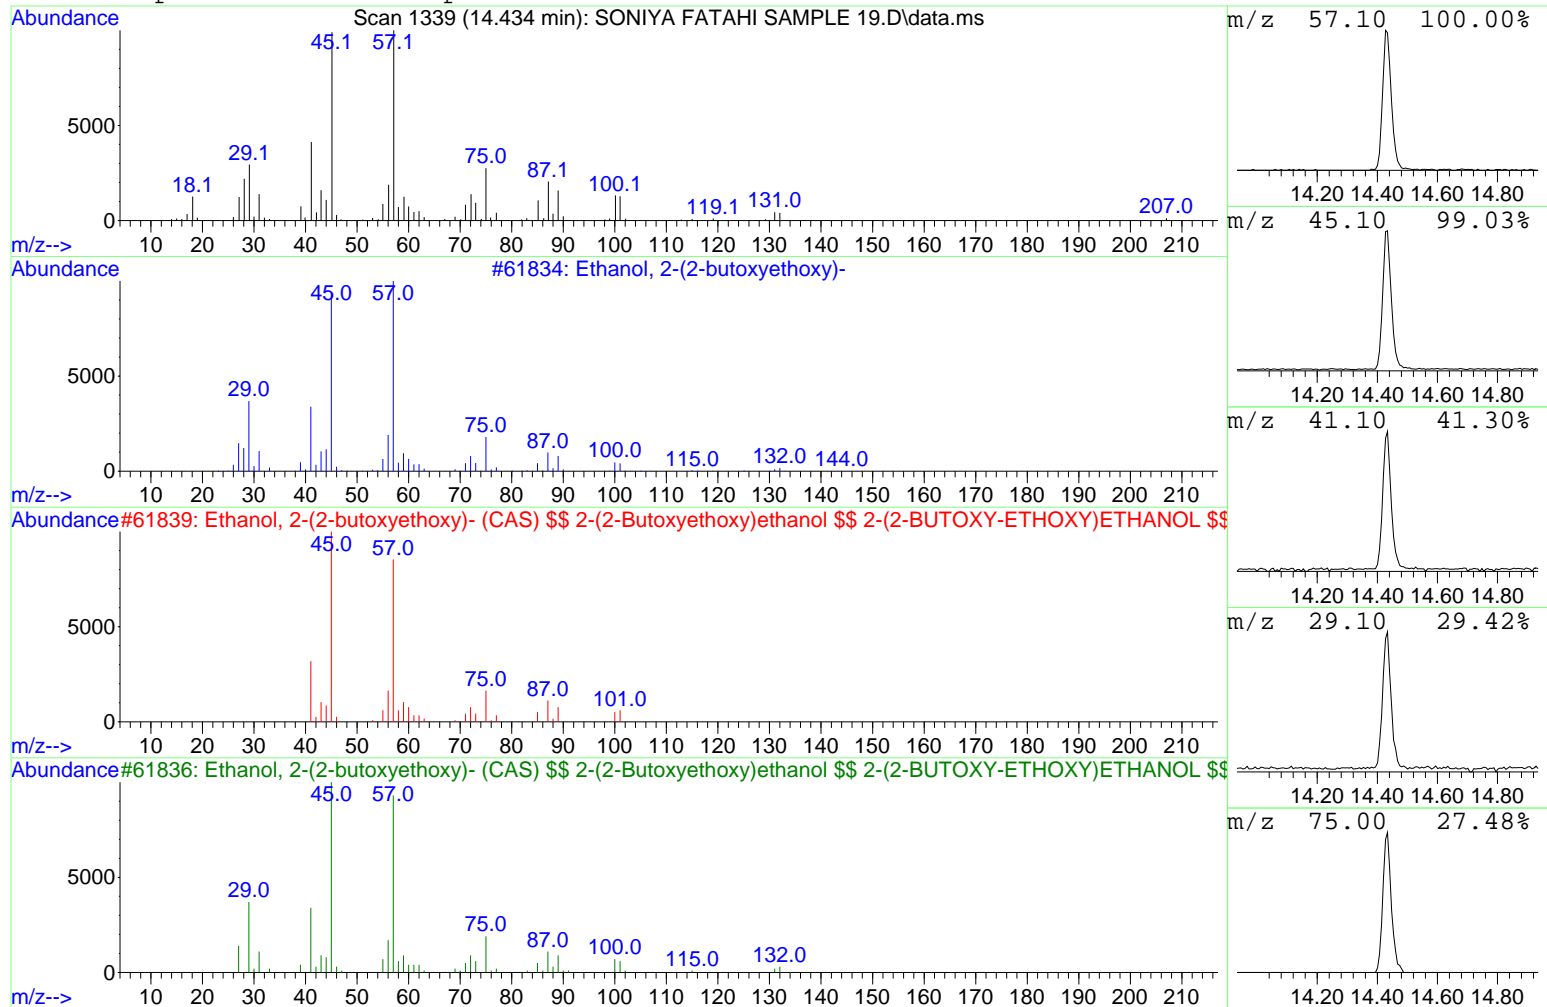

Data File: D:\result\sample AR\920506\SONIYA FATAHI SAMPLE 19.D

Sample :

Peak Number: 3 at 14.434 min Area: 337162 Area % 2.53

The 3 best hits from each library.

Ref\# CAS\# Qual

C:\Database\wiley7n.1

| Ref\# | CAS\#             | Qual |
|-------|-------------------|------|
| 1     | 61834 000112-34-5 | 90   |
| 2     | 61839 000112-34-5 | 90   |
| 3     | 61836 000112-34-5 | 86   |

## Unknown Spectrum based on Apex

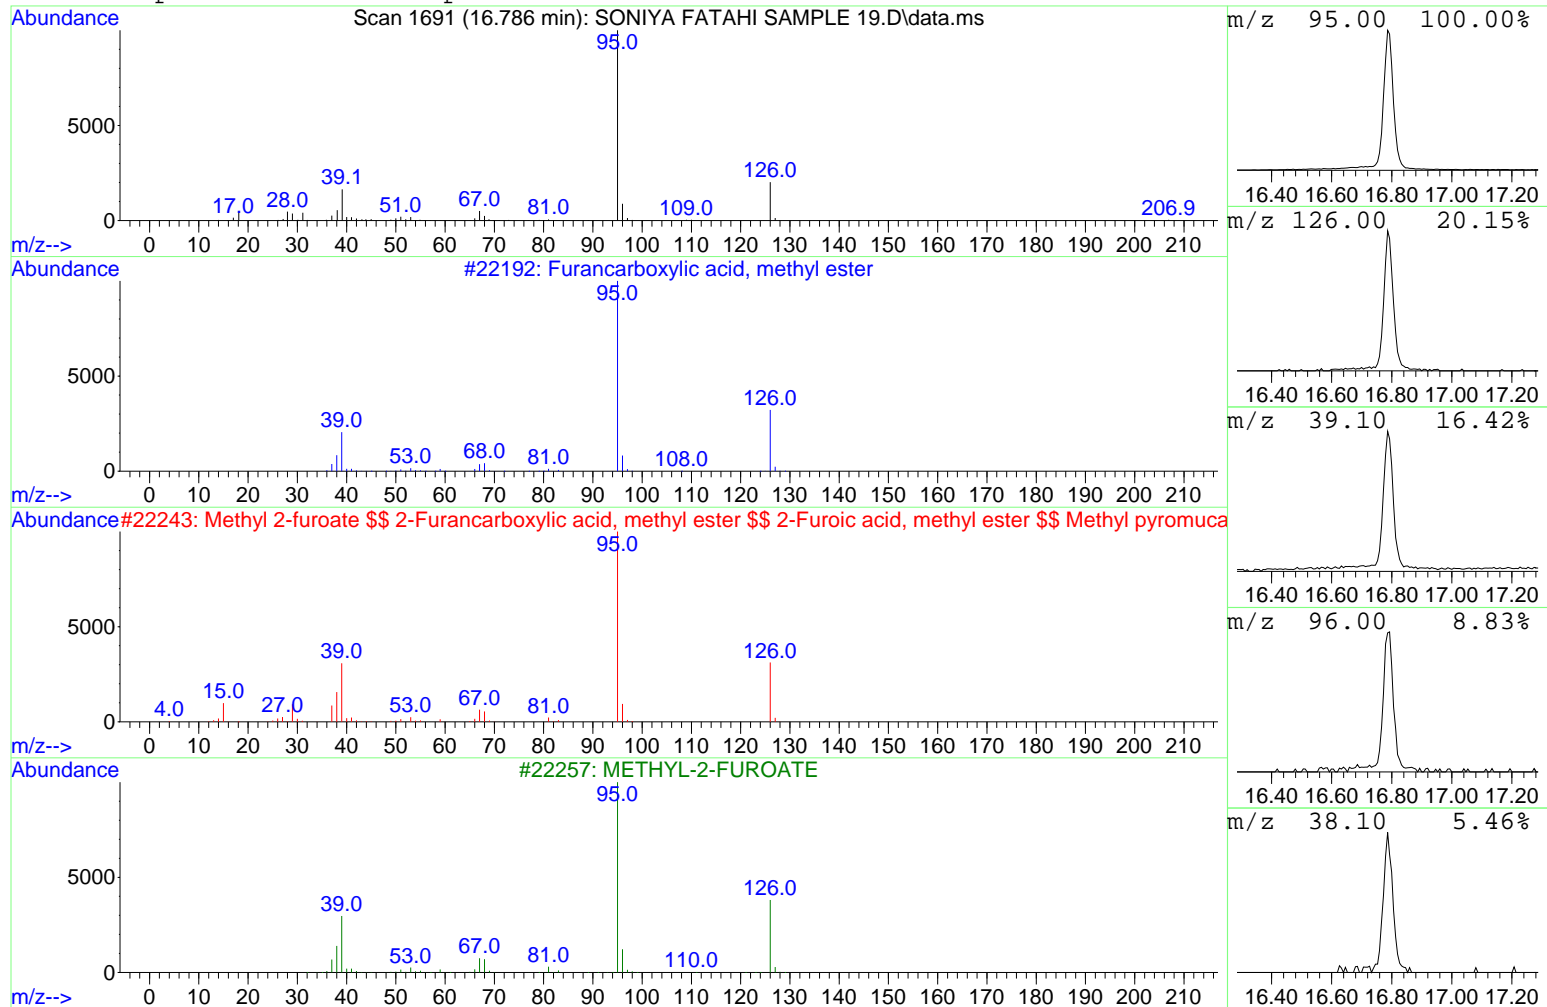

Data File: D:\result\sample AR\920506\SONIYA FATAHI SAMPLE 19.D

Sample :

Peak Number: 4 at 16.786 min Area: 361102 Area % 2.71

The 3 best hits from each library.

Ref\# CAS\# Qual

C:\Database\wiley7n.1

| Ref\# | CAS\#             | Qual |
|-------|-------------------|------|
| 1     | 22192 001334-76-5 | 91   |
| 2     | 22243 000611-13-2 | 90   |
| 3     | 22257 000611-13-2 | 83   |

## Unknown Spectrum based on Apex

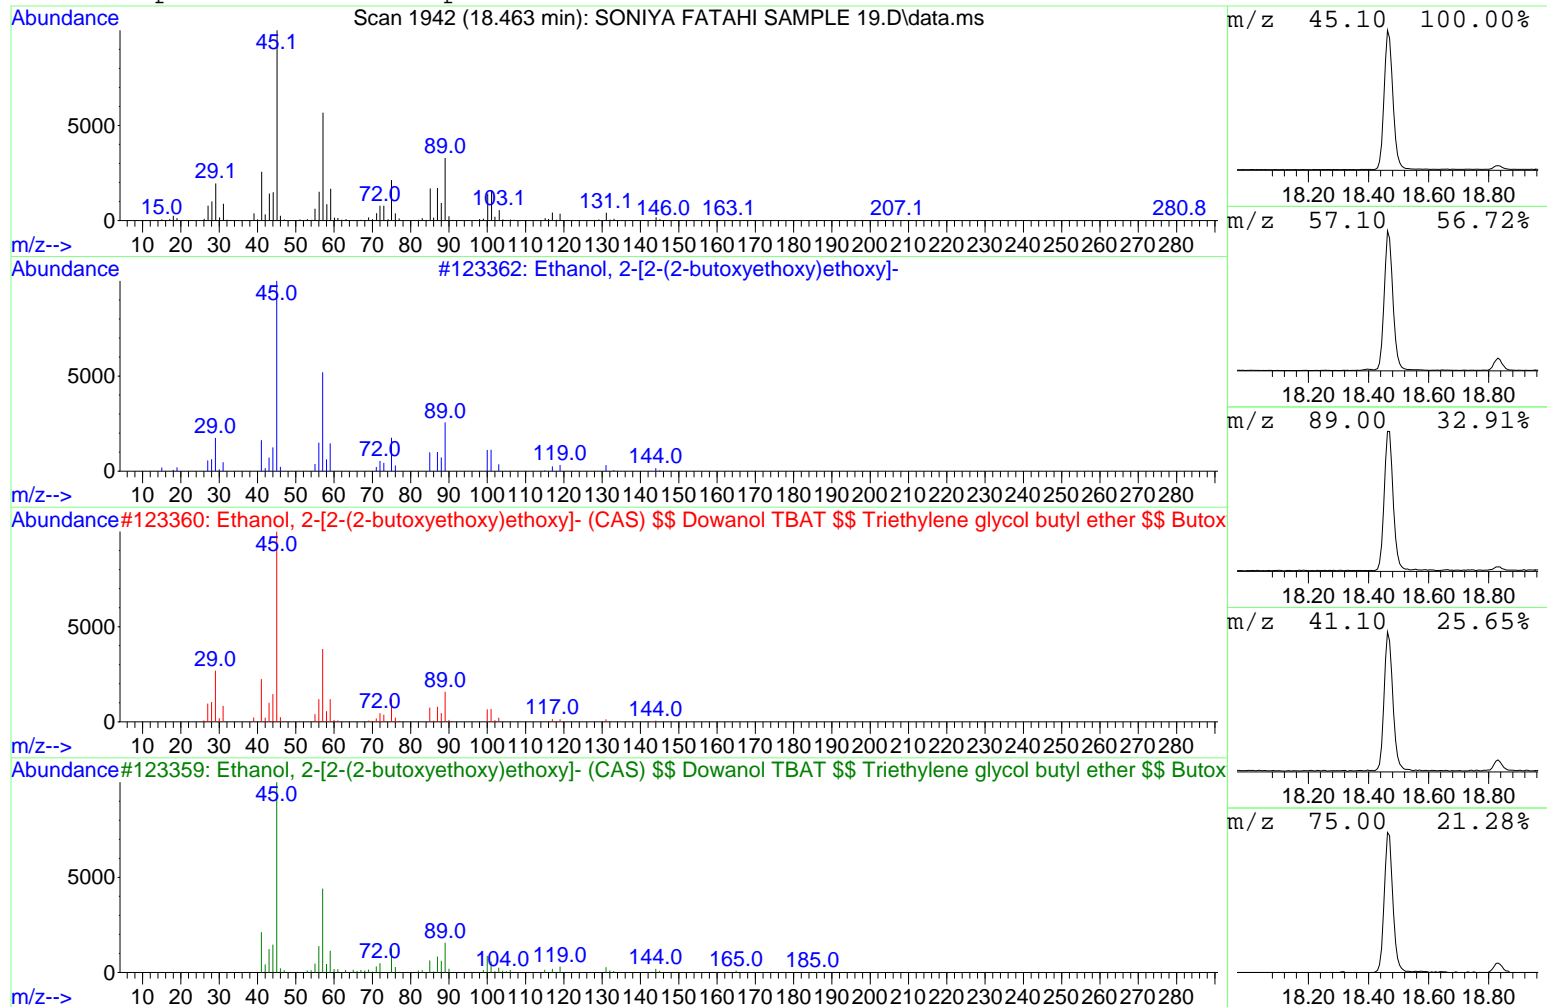

Data File: D:\result\sample AR\920506\SONIYA FATAHI SAMPLE 19.D

Sample :

Peak Number: 5 at 18.463 min Area: 1717974 Area % 12.91

The 3 best hits from each library.

Ref\# CAS\# Qual

C:\Database\wiley7n.l

| Ref\# | CAS\#              | Qual |
|-------|--------------------|------|
| 1     | 123362 000143-22-6 | 91   |
| 2     | 123360 000143-22-6 | 91   |
| 3     | 123359 000143-22-6 | 90   |

## Unknown Spectrum based on Apex

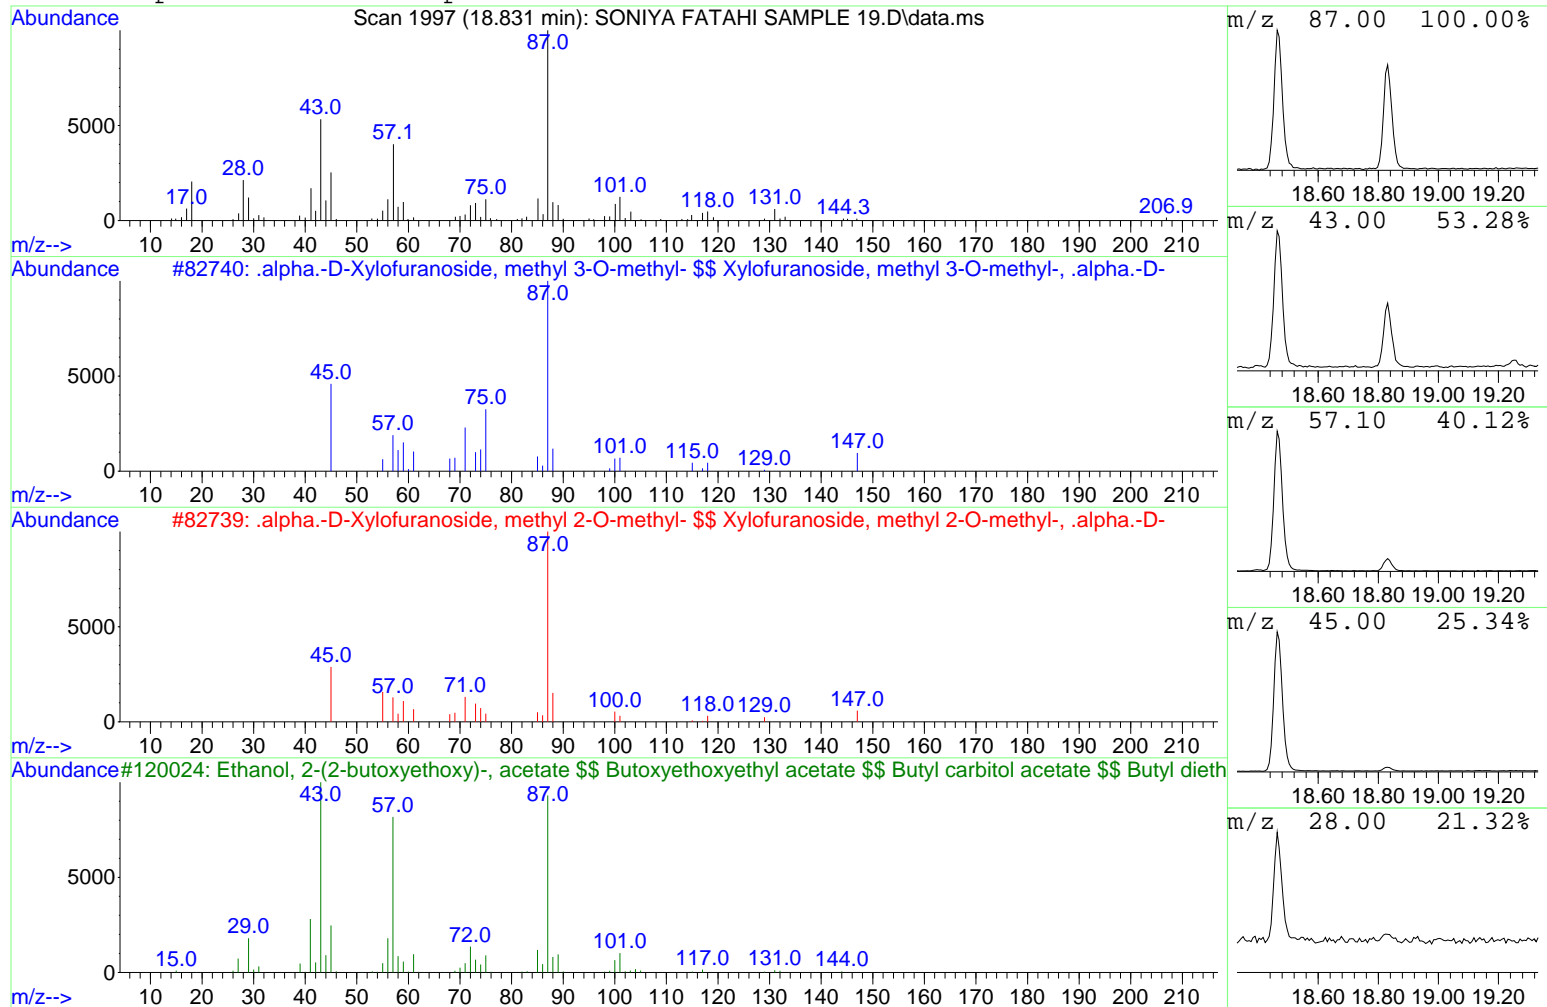

Data File: D:\result\sample AR\920506\SONIYA FATAHI SAMPLE 19.D

Sample :

Peak Number: 6 at 18.831 min Area: 172527 Area % 1.30

The 3 best hits from each library.

Ref\# CAS\# Qual

C:\Database\wiley7n.1

| Ref\# | CAS\#                               | Qual                  |
|-------|-------------------------------------|-----------------------|
| 1     | .alpha.-D-Xylofuranoside, methyl... | 82740 034338-86-8 64  |
| 2     | .alpha.-D-Xylofuranoside, methyl... | 82739 032469-86-6 64  |
| 3     | Ethanol, 2-(2-butoxyethoxy)-, ac... | 120024 000124-17-4 64 |

## Unknown Spectrum based on Apex

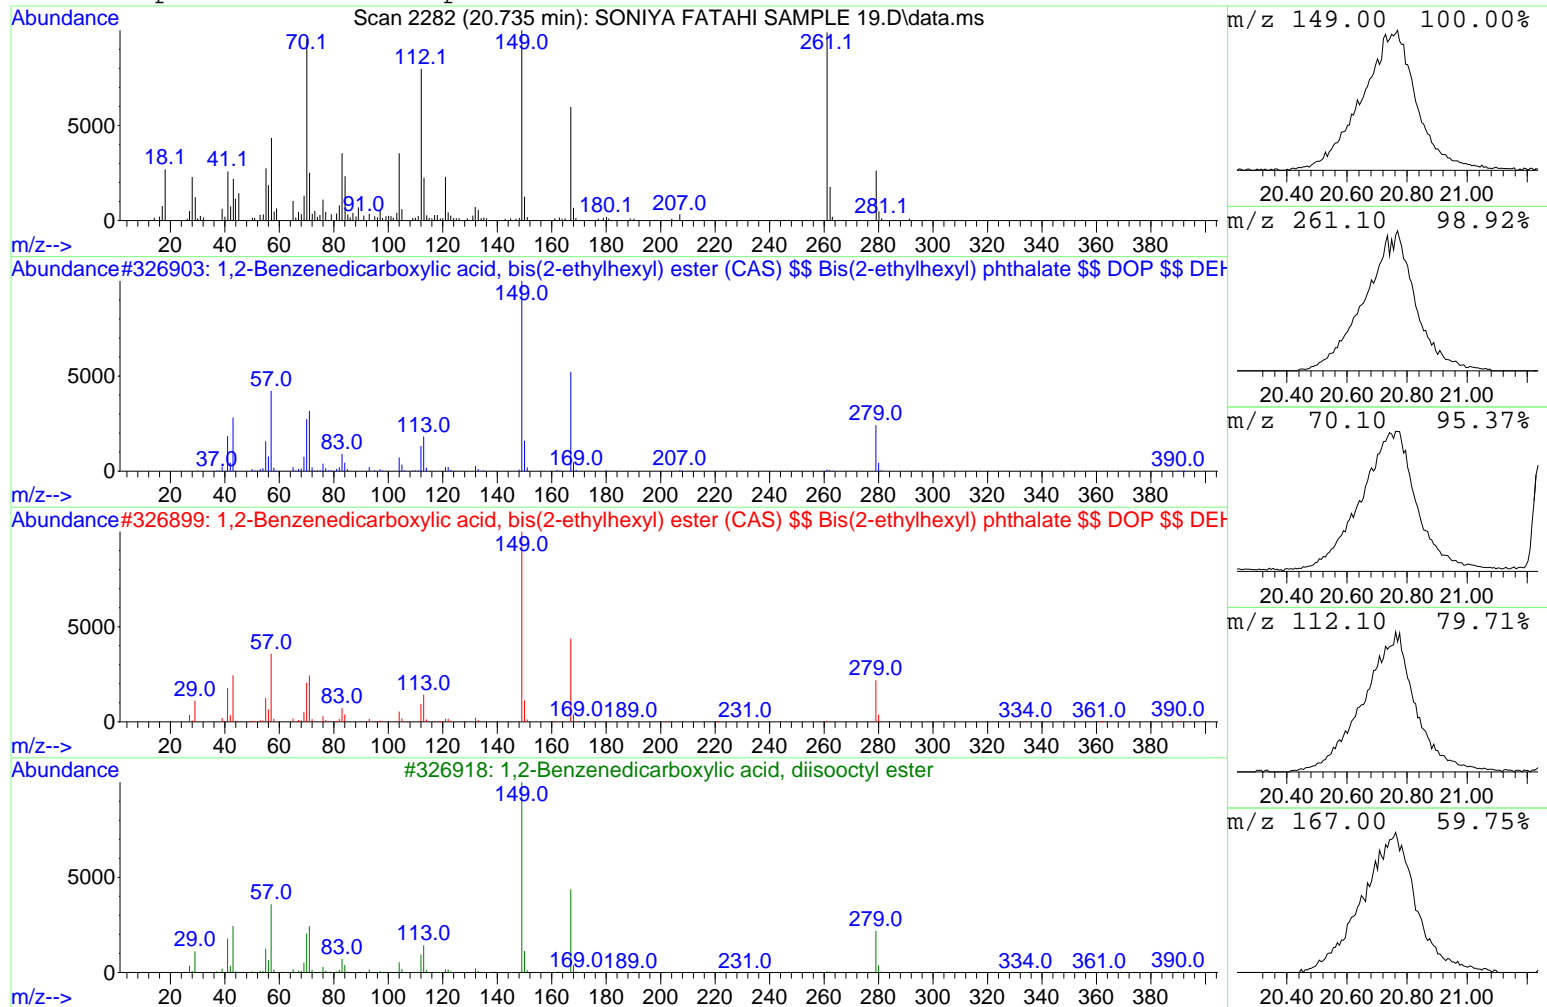

Data File: D:\result\samle AR\920506\SONIYA FATAHI SAMPLE 19.D

Sample :

Peak Number: 7 at 20.735 min Area: 1004751 Area % 7.55

The 3 best hits from each library.

Ref\# CAS\# Qual

C:\Database\wiley7n.1

| Ref\# | CAS\#              | Qual |
|-------|--------------------|------|
| 1     | 326903 000117-81-7 | 30   |
| 2     | 326899 000117-81-7 | 27   |
| 3     | 326918 027554-26-3 | 27   |



## Unknown Spectrum based on Apex

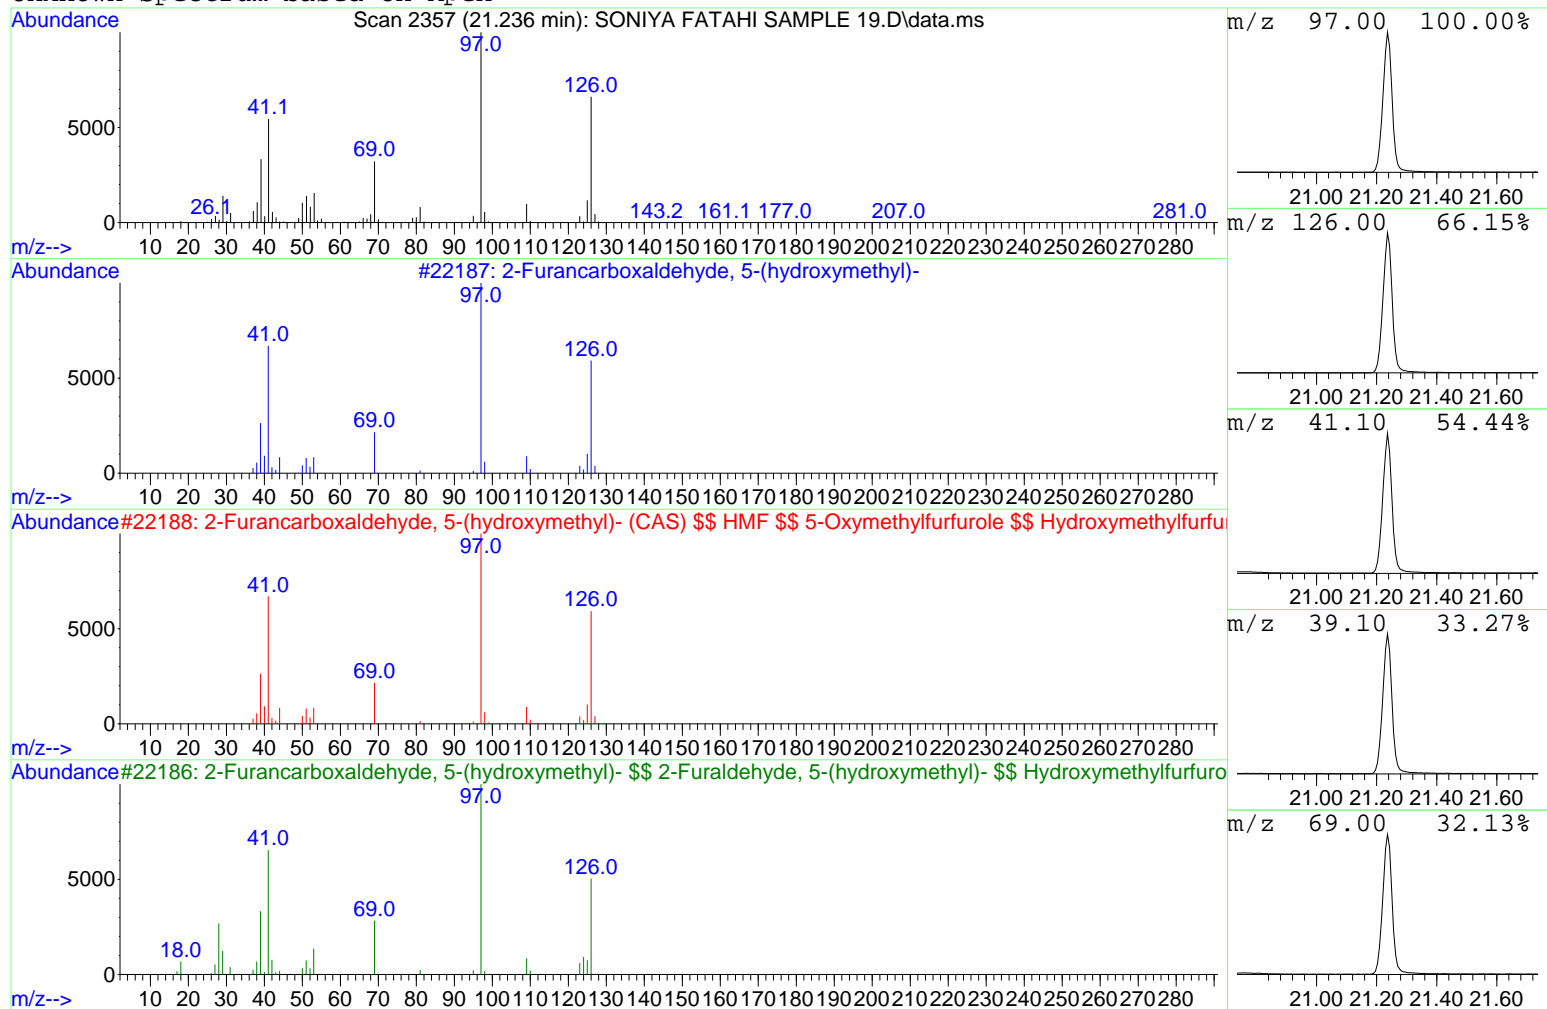

Data File: D:\result\sample AR\920506\SONIYA FATAHI SAMPLE 19.D

Sample :

Peak Number: 8 at 21.236 min Area: 7281767 Area % 54.71

The 3 best hits from each library.

Ref\# CAS\# Qual

C:\Database\wiley7n.l

| Ref\# | CAS\#             | Qual |
|-------|-------------------|------|
| 1     | 22187 000067-47-0 | 91   |
| 2     | 22188 000067-47-0 | 91   |
| 3     | 22186 000067-47-0 | 90   |

## Unknown Spectrum based on Apex

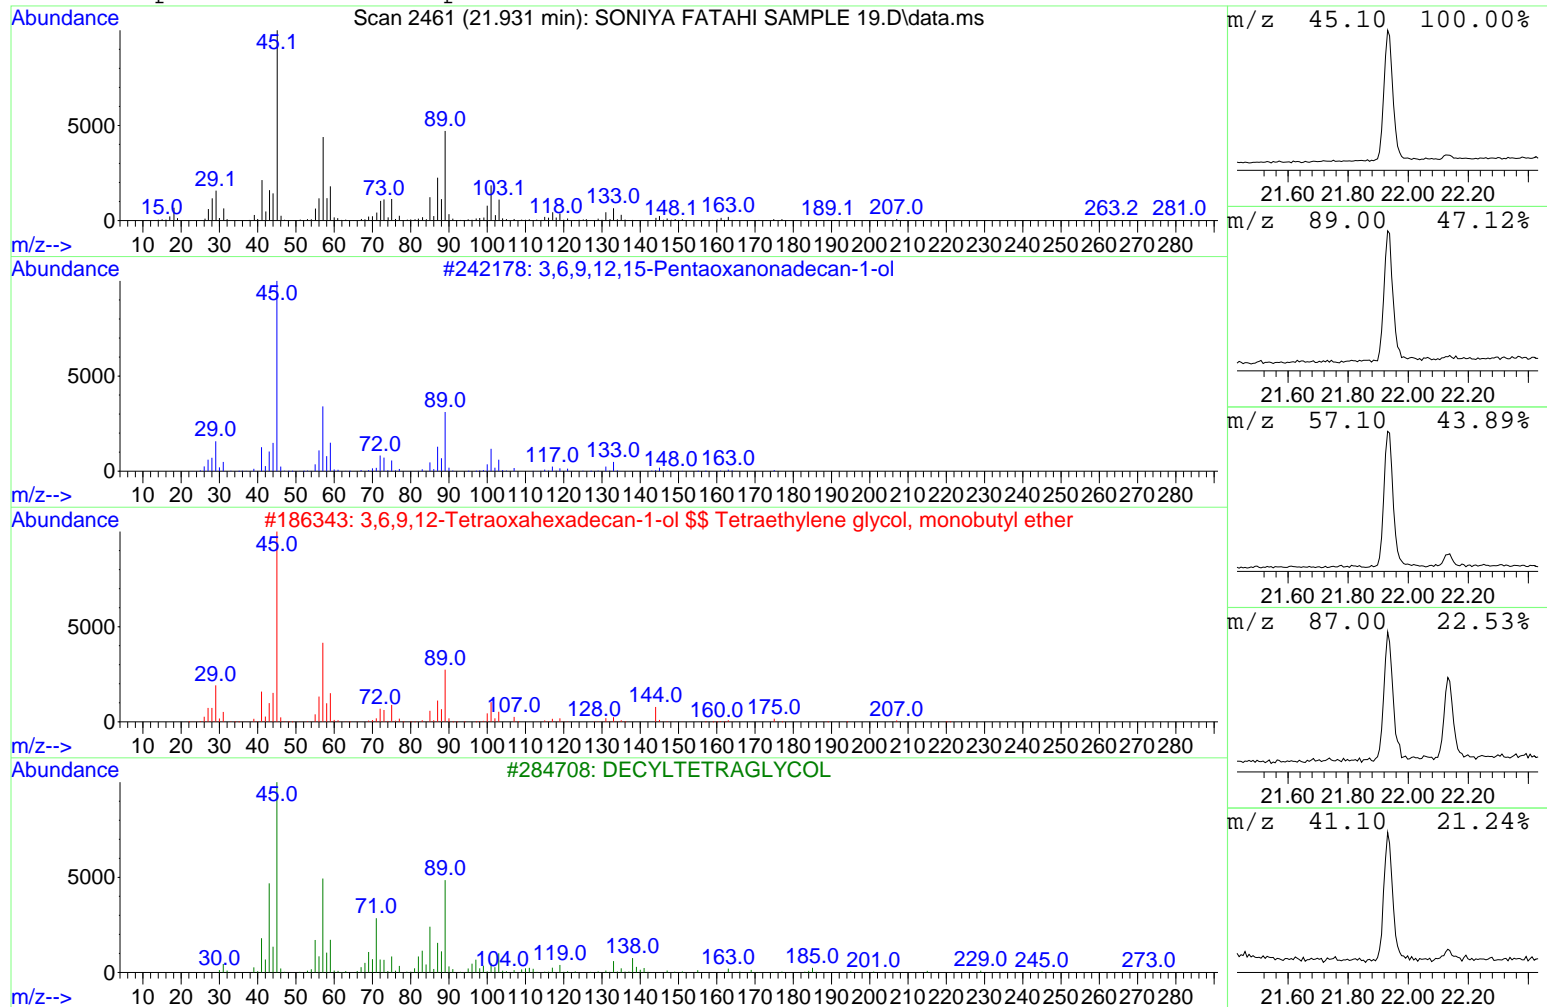

Data File: D:\result\sample AR\920506\SONIYA FATAHI SAMPLE 19.D

Sample :

Peak Number: 9 at 21.931 min Area: 677176 Area % 5.09

The 3 best hits from each library.

Ref\# CAS\# Qual

C:\Database\wiley7n.l

| Ref\# | CAS\#                                                  | Qual |
|-------|--------------------------------------------------------|------|
| 1     | 242178 001786-94-3                                     | 91   |
| 2     | 3,6,9,12-Tetraoxahexadecan-1-ol ... 186343 001559-34-8 | 90   |
| 3     | DECYLTETRAGLYCOL 284708 000000-00-0                    | 72   |

## Unknown Spectrum based on Apex

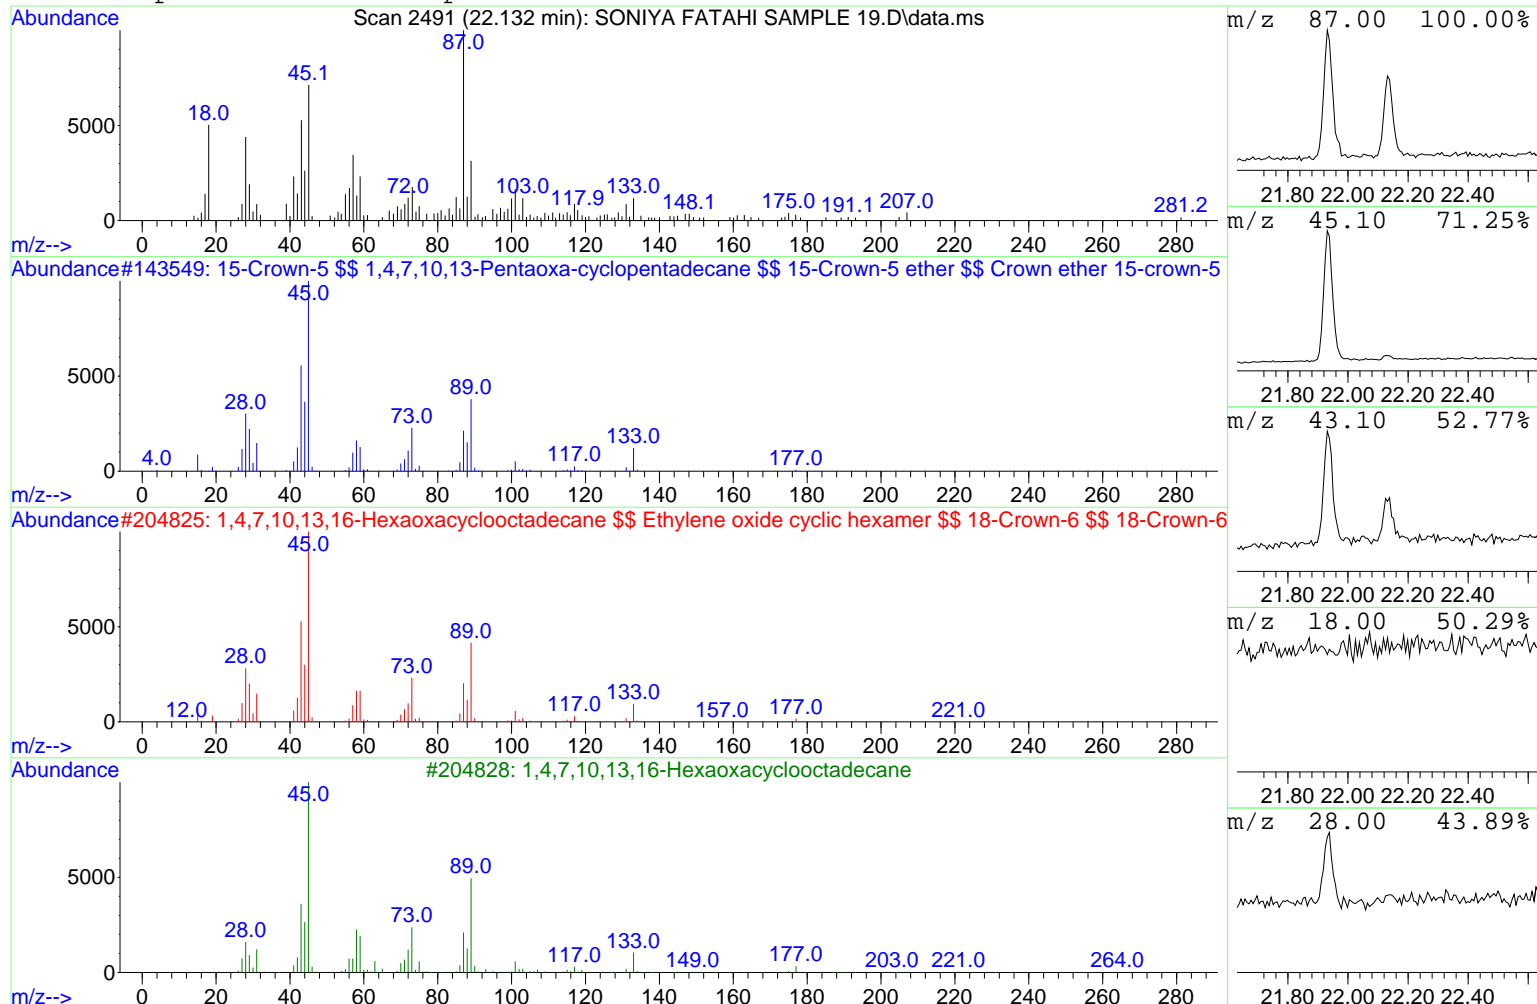

Data File: D:\result\sample AR\920506\SONIYA FATAHI SAMPLE 19.D

Sample :

Peak Number: 10 at 22.132 min Area: 80476 Area % 0.60

The 3 best hits from each library.

Ref\# CAS\# Qual

C:\Database\wiley7n.1

| Ref\# | CAS\#              | Qual |
|-------|--------------------|------|
| 1     | 143549 033100-27-5 | 38   |
| 2     | 204825 017455-13-9 | 38   |
| 3     | 204828 017455-13-9 | 38   |

## Unknown Spectrum based on Apex

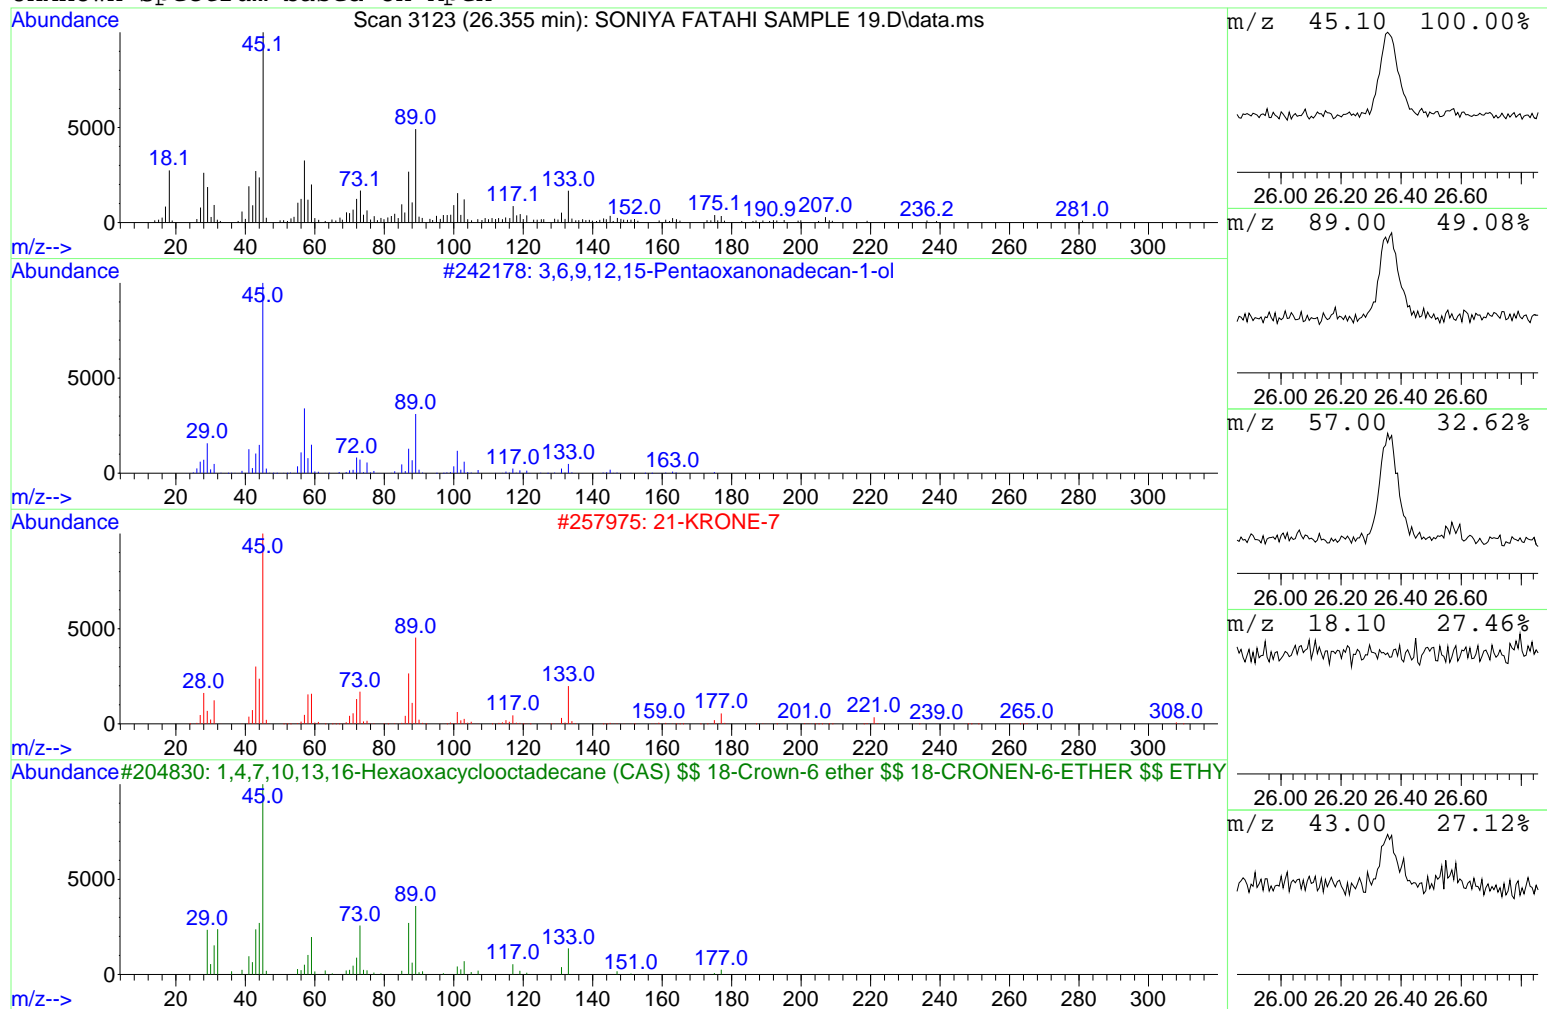

Data File: D:\result\sample AR\920506\SONIYA FATAHI SAMPLE 19.D

Sample :

Peak Number: 11 at 26.355 min Area: 239441 Area % 1.80

The 3 best hits from each library.

Ref\# CAS\# Qual

C:\Database\wiley7n.1

| Ref\# | CAS\#                               | Qual                  |
|-------|-------------------------------------|-----------------------|
| 1     | 3,6,9,12,15-Pentaoxonadecan-1-ol    | 242178 001786-94-3 72 |
| 2     | 21-KRONE-7                          | 257975 000000-00-0 64 |
| 3     | 1,4,7,10,13,16-Hexaoxacyclooctad... | 204830 017455-13-9 64 |
